# Supplementary material for: The evolution of methane production rates from young to mature thermokarst lakes
Source: Copernicus journal article supplement (doi:10.5194/egusphere-2025-1504), 2025-04-25
Supplement: Supplementary file [file egusphere-2025-1504-supplement_rev2.pdf › egusphere-2025-1504-supplement_rev2.pdf]

## Supporting Information

### **The evolution of methane production rates from young to mature thermokarst lakes**

Yarden Gerera<sup>1</sup>, Andre Pellerin<sup>2</sup>, Efrat Eliani Russak<sup>1</sup>, Katey Walter Anthony<sup>3</sup>, Nicholas Hasson<sup>3</sup>, Yoav Oved Rosenberg<sup>4</sup>, Orit Sivan<sup>1\*</sup>

1 Department of Earth and Environmental Science, Ben-Gurion University of the Negev, Beer Sheva, Israel

2 Institut des sciences de la mer, Université du Québec à Rimouski, Rimouski, Québec, Canada

3 Water and Environmental Research Center, University of Alaska Fairbanks, Fairbanks, AK, USA

4 Geological Survey of Israel, Jerusalem 9692100, Israel

\*Corresponding author

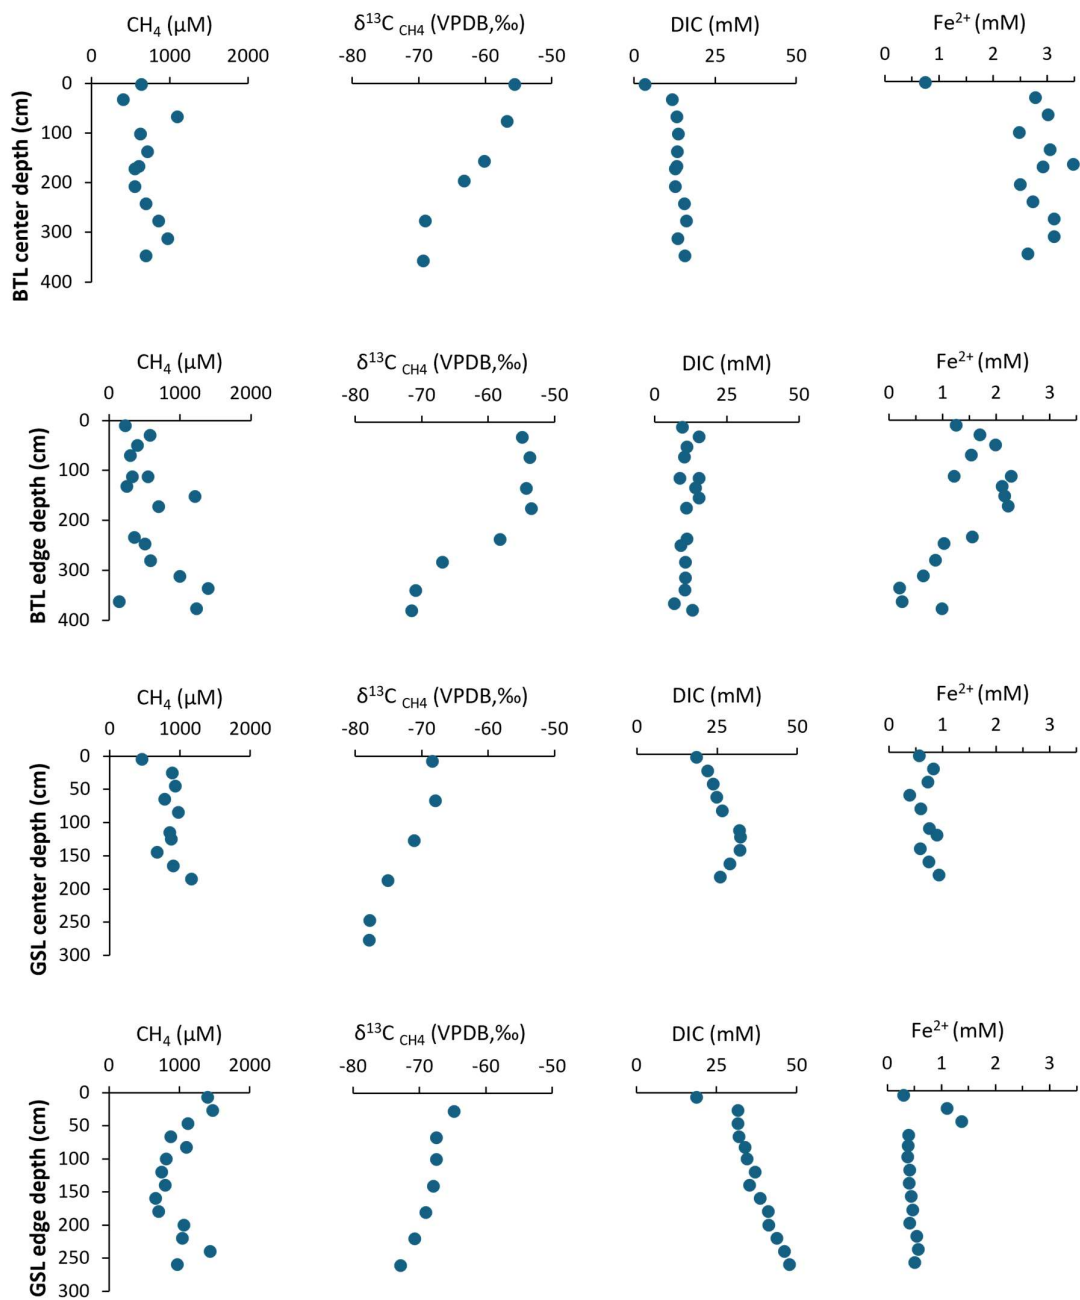

**Figure S1:** Pore water profiles of Goldstream Lake (GSL) center (A) and edge (B) cores and Big Trail Lake (BTL) center (C) and edge (D) cores. Error bars with markers limit unless depicted otherwise.

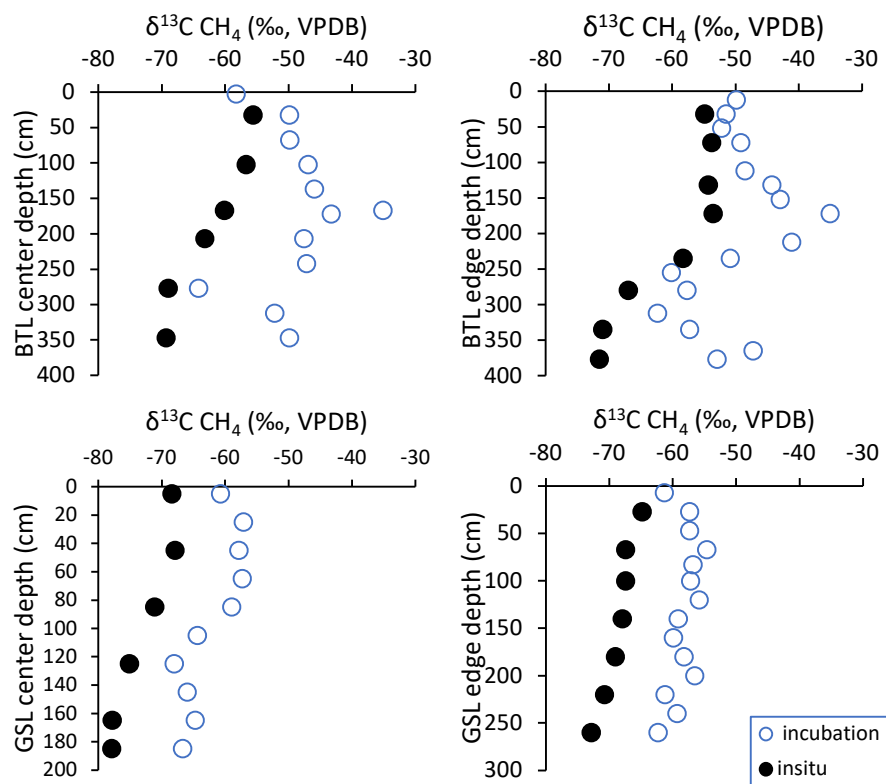

Figure S2:  $\delta^{13}\text{C}_{\text{CH}_4}$  profiles *insitu* and long term (90 days) incubations.

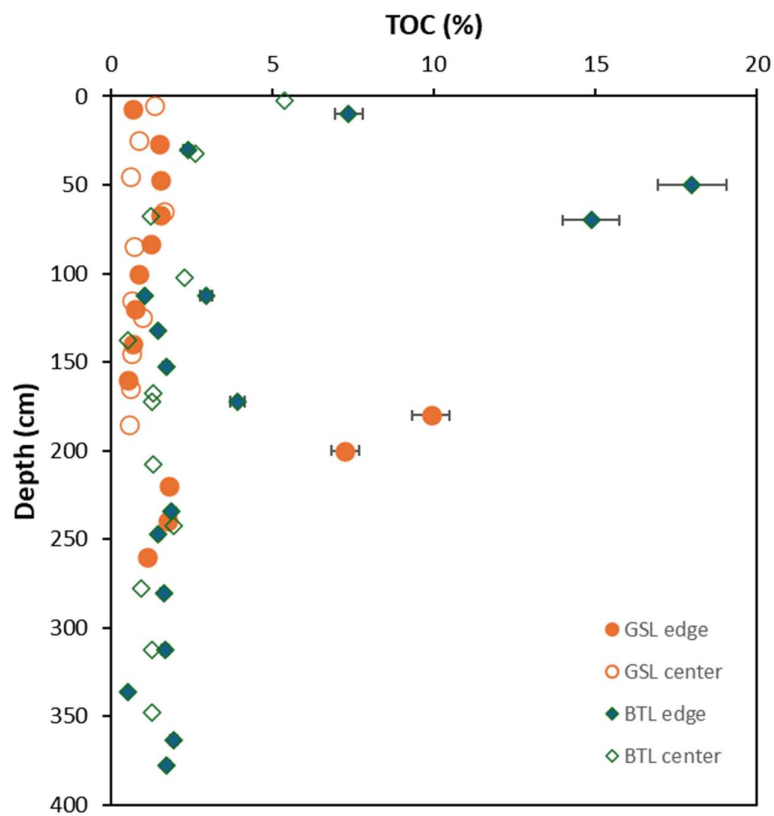

Figure S3: TOC percentage in cores.

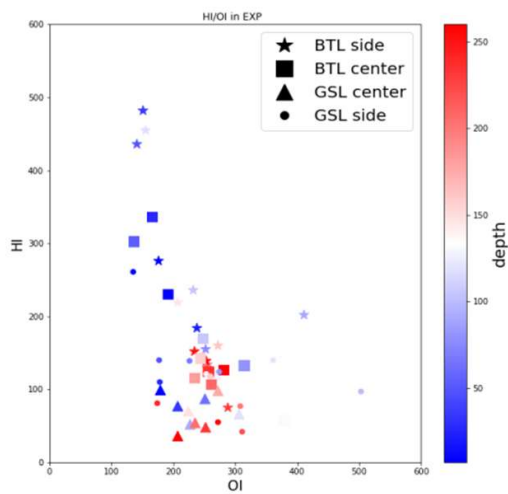

Figure S4: Hydrogen index (HI) versus oxygen index (OI) calculated from Rock Eval analyses at the study sites. The depths are marked as different colors. A decrease in HI and an increase in OI in greater depths and with lake aging is observed.

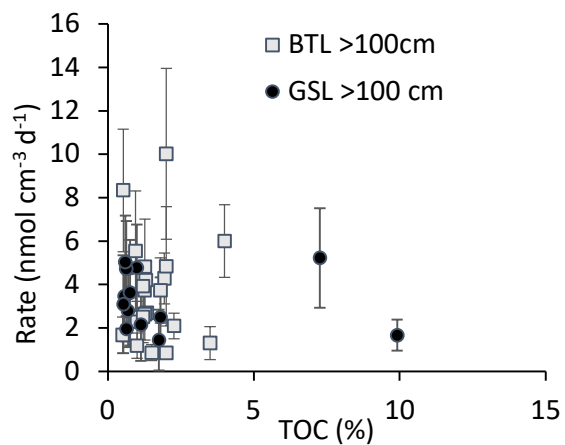

**Figure S5:** Methane production rates as a function of TOC in BTL and GSL depths greater than 100 cm. The methane production rates between GSL and BTL are not significantly different.

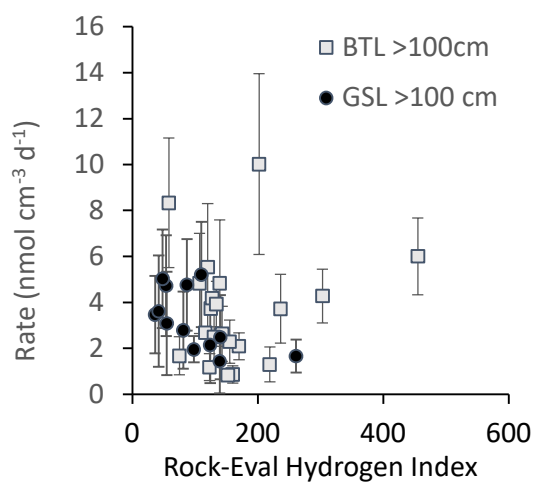

**Figure S6:** Methane production rates are not correlated to the lability of the organic matter for thermal reactions, as indicated by the hydrogen index obtained by Rock Eval pyrolysis at depths greater than 100cm in GSL and BTL talik.

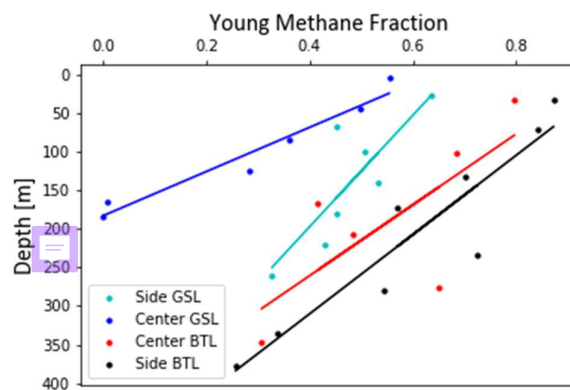

**Figure S7:** Newly Produced Methane Fraction in Each Core at Various Depths. Calculated from  $\delta^{13}\text{C}_{\text{CH}_4}$  measured *insitu* and from the incubation experiment. Blue dots denote GSL center core, light blue denotes GSL edge core, red dots denote BTL center core, and black dots denote BTL edge core. A similar color trend line has been fitted for each core. We can observe that the fraction becomes smaller with depth, **and** the fraction is smaller as the core area matures.

**Table S1:** Core sediments profiles data

| Core       | Dep. | Por.  | S1   | S2    | Tmax | S3    | PC   | RC   | TOC  | HI  | OI  | MINC | $\delta^{13}\text{C}_{\text{TOC}}$ |     | N    |      |
|------------|------|-------|------|-------|------|-------|------|------|------|-----|-----|------|------------------------------------|-----|------|------|
|            | cm   | Ww/Ws | mg/g | mg/g  | °C   | mg/g  | %    | %    | %    | -   | -   | %    | ‰ VPDB                             | ±   | %    | ±    |
| GSL edge   | 7    | 0.4   | 0.00 | 0.67  | 429  | 3.47  | 0.18 | 0.51 | 0.7  | 97  | 503 | 1.02 | -31.1                              | 0.4 | -    | -    |
|            | 27   | 0.3   | 0.01 | 2.10  | 427  | 5.42  | 0.38 | 1.12 | 1.5  | 140 | 361 | 1.55 | -26.0                              | 0.2 | -    | -    |
|            | 47   | 0.3   | 0.01 | 1.87  | 425  | 3.92  | 0.30 | 1.25 | 1.6  | 121 | 253 | 0.37 | -25.0                              | 0.4 | 0.18 | -    |
|            | 67   | 0.3   | 0.00 | 1.81  | 429  | 3.98  | 0.29 | 1.24 | 1.5  | 118 | 260 | 0.30 | -24.7                              | 0.3 | 0.18 | -    |
|            | 83   | 0.4   | 0.01 | 1.43  | 430  | 2.89  | 0.22 | 1.02 | 1.2  | 115 | 233 | 0.27 | -25.0                              | 0.5 | 0.17 | -    |
|            | 100  | 0.27  | 0.01 | 0.68  | 425  | 2.71  | 0.14 | 0.74 | 0.9  | 77  | 308 | 0.31 | -27.5                              | 0.5 | 0.09 | 0.01 |
|            | 120  | 0.28  | 0.00 | 0.32  | 434  | 2.36  | 0.10 | 0.66 | 0.8  | 42  | 311 | 0.32 | -23.9                              | 0.5 | 0.05 | 0.00 |
|            | 140  | 0.28  | 0.01 | 0.56  | 423  | 1.20  | 0.09 | 0.60 | 0.7  | 81  | 174 | 0.39 | -24.4                              | 0.5 | 0.05 | 0.00 |
|            | 160  | 0.24  | 0.00 | 0.29  | 432  | 1.44  | 0.07 | 0.46 | 0.5  | 55  | 272 | 0.32 | -26.3                              | 0.5 | 0.05 | 0.01 |
|            | 180  | 0.24  | 0.09 | 25.8  | 339  | 13.3  | 2.75 | 7.16 | 9.9  | 261 | 135 | 0.69 | -24.1                              | 0.5 | 0.84 | -    |
|            | 200  | 0.24  | 0.02 | 7.97  | 291  | 12.9  | 1.22 | 6.04 | 7.3  | 110 | 178 | 0.68 | -24.0                              | 0.4 | 0.38 | -    |
|            | 220  | 0.23  | 0.00 | 2.52  | 413  | 3.19  | 0.34 | 1.46 | 1.8  | 140 | 177 | 0.30 | -23.8                              | 0.7 | 0.15 | -    |
|            | 240  | 0.21  | 0.01 | 2.43  | 415  | 3.96  | 0.35 | 1.40 | 1.8  | 139 | 226 | 0.42 | -24.3                              | 0.5 | 0.17 | -    |
|            | 260  | 0.20  | 0.00 | 1.40  | 425  | 3.10  | 0.23 | 0.90 | 1.1  | 124 | 274 | 0.68 | -24.1                              | 0.6 | 0.13 | -    |
| GSL center | 5    | 0.37  | 0.00 | 1.34  | 429  | 2.44  | 0.21 | 1.15 | 1.4  | 99  | 179 | 0.25 | -25.1                              | 0.7 | 0.09 | 0.01 |
|            | 25   | 0.31  | 0.00 | 0.66  | 431  | 1.78  | 0.12 | 0.74 | 0.9  | 77  | 207 | 0.33 | -24.7                              | 0.2 | 0.05 | 0.00 |
|            | 45   | 0.34  | 0.01 | 0.31  | 430  | 1.36  | 0.07 | 0.53 | 0.6  | 52  | 227 | 0.19 | -24.9                              | 0.6 | 0.04 | 0.00 |
|            | 65   | 0.33  | 0.01 | 1.08  | 434  | 5.02  | 0.27 | 1.37 | 1.6  | 66  | 306 | 1.00 | -24.9                              | 1.1 | 0.13 | 0.00 |
|            | 85   | 0.36  | 0.01 | 0.49  | 436  | 1.57  | 0.10 | 0.60 | 0.7  | 70  | 224 | 0.20 | -24.5                              | 1.0 | 0.08 | 0.01 |
|            | 115  | 0.27  | 0.07 | 0.63  | 342  | 1.74  | 0.12 | 0.52 | 0.6  | 98  | 272 | 0.27 | -25.1                              | 1.0 | 0.04 | 0.00 |
|            | 125  | 0.33  | 0.00 | 0.86  | 432  | 2.48  | 0.16 | 0.83 | 1.0  | 87  | 251 | 0.34 | -24.8                              | 0.8 | 0.06 | 0.00 |
|            | 145  | 0.30  | 0.01 | 0.34  | 434  | 1.48  | 0.08 | 0.55 | 0.6  | 54  | 235 | 0.23 | -25.3                              | 1.0 | 0.04 | 0.00 |
|            | 165  | 0.27  | 0.01 | 0.29  | 433  | 1.51  | 0.07 | 0.53 | 0.6  | 48  | 252 | 0.17 | -25.5                              | 0.7 | 0.02 | 0.00 |
|            | 185  | 0.28  | 0.00 | 0.21  | 432  | 1.20  | 0.06 | 0.52 | 0.6  | 36  | 207 | 0.17 | -25.4                              | 0.8 | 0.02 | 0.01 |
| BTL edge   | 10   | 0.78  | 0.11 | 20.30 | 412  | 13.00 | 2.27 | 5.10 | 7.4  | 276 | 176 | 0.62 | -28.8                              | 0.0 | 0.78 | -    |
|            | 30   | 0.35  | 0.01 | 4.38  | 426  | 5.66  | 0.60 | 1.78 | 2.4  | 184 | 238 | 0.37 | -26.3                              | 0.3 | 0.24 | -    |
|            | 50   | 0.59  | 0.3  | 86.80 | 432  | 27.20 | 8.44 | 9.56 | 18.0 | 482 | 151 | 1.13 | -28.1                              | 1.0 | 0.97 | -    |
|            | 70   | 0.54  | 0.15 | 64.00 | 433  | 21.00 | 6.33 | 8.54 | 14.9 | 436 | 141 | 0.77 | -28.8                              | 0.5 | 0.98 | -    |
|            | 113  | 0.25  | 0.01 | 1.61  | 424  | 2.62  | 0.23 | 0.81 | 1.0  | 155 | 252 | 0.19 | -26.9                              | 0.3 | 0.11 | -    |
|            | 133  | 0.29  | 0.02 | 2.97  | 428  | 6.04  | 0.47 | 1.00 | 1.5  | 202 | 411 | 0.46 | -29.0                              | 0.5 | 0.13 | -    |
|            | 153  | 0.27  | 0.01 | 4.09  | 427  | 4.01  | 0.50 | 1.23 | 1.7  | 236 | 232 | 0.23 | -27.3                              | 0.5 | 0.17 | -    |
|            | 173  | 0.32  | 0.05 | 17.80 | 430  | 6.08  | 1.74 | 2.18 | 3.9  | 455 | 155 | 0.45 | -27.8                              | 0.1 | 0.28 | -    |
|            | 113  | 0.34  | 0.01 | 6.47  | 421  | 6.10  | 0.80 | 2.15 | 3.0  | 219 | 207 | 0.37 | -28.3                              | 1.5 | 0.27 | -    |
|            | 235  | 0.28  | 0.01 | 3.03  | 417  | 5.14  | 0.46 | 1.43 | 1.9  | 160 | 272 | 0.37 | -26.3                              | 0.4 | 0.22 | -    |
|            | 248  | 0.28  | 0.01 | 1.81  | 421  | 3.86  | 0.3  | 1.17 | 1.5  | 123 | 263 | 0.34 | -25.3                              | 0.5 | 0.17 | -    |
|            | 281  | 0.31  | 0.01 | 2.20  | 421  | 4.19  | 0.35 | 1.29 | 1.6  | 134 | 255 | 0.34 | -24.6                              | 0.5 | 0.17 | -    |
|            | 313  | 0.28  | 0.01 | 2.19  | 421  | 4.27  | 0.35 | 1.33 | 1.7  | 130 | 254 | 0.30 | -25.4                              | 0.4 | 0.18 | -    |
|            | 337  | 0.21  | 0.00 | 0.39  | 426  | 1.50  | 0.08 | 0.44 | 0.5  | 75  | 288 | 0.15 | -25.6                              | 0.5 | 0.08 | -    |
|            | 364  | 0.29  | 0.01 | 2.98  | 422  | 4.58  | 0.44 | 1.52 | 2.0  | 152 | 234 | 0.35 | -25.6                              | 0.6 | 0.21 | -    |
|            | 378  | 0.35  | 0.01 | 2.41  | 419  | 4.41  | 0.38 | 1.36 | 1.7  | 139 | 253 | 0.32 | -26.1                              | 0.6 | 0.18 | -    |
| BTL center | 3    | 0.65  | 0.07 | 12.40 | 411  | 10.3  | 1.49 | 3.90 | 5.4  | 231 | 191 | 0.58 | -27                                | 1.6 | 0.18 | -    |
|            | 33   | 0.32  | 0.00 | 8.79  | 432  | 4.30  | 0.90 | 1.71 | 2.6  | 337 | 165 | 0.32 | -27                                | 1.0 | 0.13 | -    |
|            | 68   | 0.25  | 0.00 | 1.66  | 424  | 3.92  | 0.28 | 0.97 | 1.3  | 133 | 314 | 0.27 | -27                                | 1.0 | 0.17 | -    |
|            | 103  | 0.27  | 0.00 | 3.85  | 422  | 5.60  | 0.55 | 1.72 | 2.3  | 170 | 247 | 0.29 | -28                                | 1.0 | 0.13 | -    |
|            | 138  | 0.27  | 0.00 | 0.30  | 429  | 1.97  | 0.09 | 0.43 | 0.5  | 58  | 379 | 0.12 | -27                                | 1.0 | 0.09 | -    |
|            | 168  | 0.25  | 0.00 | 1.54  | 425  | 3.11  | 0.25 | 1.08 | 1.3  | 116 | 234 | 0.22 | -27                                | 1.0 | 0.13 | -    |
|            | 173  | 0.25  | 0.00 | 1.57  | 425  | 3.23  | 0.25 | 1.01 | 1.3  | 125 | 256 | 0.23 | -25                                | 0.9 | 0.15 | -    |
|            | 208  | 0.29  | 0.00 | 1.65  | 423  | 3.65  | 0.28 | 1.02 | 1.3  | 127 | 281 | 0.26 | -25                                | 0.7 | 0.18 | -    |
|            | 243  | 0.27  | 0.02 | 5.87  | 428  | 2.63  | 0.6  | 1.34 | 1.9  | 303 | 136 | 0.18 | -26                                | 1.2 | 0.17 | -    |

|  |     |      |      |      |     |      |      |      |     |     |     |      |     |     |      |   |
|--|-----|------|------|------|-----|------|------|------|-----|-----|-----|------|-----|-----|------|---|
|  | 278 | 0.25 | 0.01 | 1.14 | 422 | 2.54 | 0.19 | 0.76 | 1.0 | 120 | 267 | 0.17 | -28 | 1.3 | 0.08 | - |
|  | 313 | 0.28 | 0.01 | 1.81 | 439 | 3.08 | 0.28 | 0.99 | 1.3 | 143 | 243 | 0.21 | -26 | 1.3 | 0.13 | - |
|  | 348 | 0.31 | 0.01 | 1.36 | 422 | 3.31 | 0.24 | 1.03 | 1.3 | 107 | 261 | 0.30 | -25 | 0.9 | 0.15 | - |

**Table S2:** Cores porewater profiles data



| sample     | Sample ID | Dep. | Na            | SO <sub>4</sub> | Mn  | Fe   | PO <sub>4</sub> | NH <sub>4</sub> | NO <sub>x</sub> | DIC  | $\delta^{13}\text{C}$ DIC | CH <sub>4</sub> | $\delta^{13}\text{C}$ CH <sub>4</sub> | $\delta^{13}\text{C}$ CO <sub>2</sub> |
|------------|-----------|------|---------------|-----------------|-----|------|-----------------|-----------------|-----------------|------|---------------------------|-----------------|---------------------------------------|---------------------------------------|
|            |           | cm   | $\mu\text{M}$ |                 |     |      |                 |                 |                 | mM   | ‰, VPDB                   | $\mu\text{M}$   | ‰, VPDB                               | ‰, VPDB                               |
| GSL edge   | vc1       | 7    | 3666          | 152             | 69  | 305  | 3.9             | 639             | 10.7            | 18.7 | -2.0                      | 1405            | -                                     | -                                     |
|            | vc2       | 27   | 5257          | 102             | 251 | 1107 | 3.6             | 1221            | 6.8             | 31.8 | -2.1                      | 1478            | -64.8                                 | -19.1                                 |
|            | vc3       | 47   | 3328          | 254             | 54  | 1377 | 5.3             | 1402            | 5.5             | 31.6 | -3.6                      | 1123            | -                                     | -                                     |
|            | vc4       | 67   | 3523          | 227             | 13  | 394  | 5.1             | 1580            | 3.5             | 32.1 | -4.3                      | 879             | -67.4                                 | -19.3                                 |
|            | vc5       | 83   | 3615          | 279             | 7   | 387  | 5.4             | 1549            | 6.7             | 34.0 | -6.0                      | 1103            | -                                     | -                                     |
|            | vc6       | 100  | 3150          | 291             | 6   | 378  | 9.4             | 1234            | 3.0             | 34.5 | -6.3                      | 817             | -67.4                                 | -21.3                                 |
|            | vc7       | 120  | 2772          | 293             | 6   | 415  | 7.2             | 1640            | 3.2             | 37.0 | -6.9                      | 750             | -                                     | -                                     |
|            | vc8       | 140  | 1308          | 311             | 6   | 406  | 6.2             | 1711            | 4.0             | 35.4 | -5.4                      | 802             | -67.9                                 | -21.3                                 |
|            | vc9       | 160  | 2396          | 327             | 5   | 443  | 7.7             | 1649            | -               | 38.6 | -5.6                      | 664             | -                                     | -                                     |
|            | vc10      | 180  | 2540          | 339             | 5   | 469  | 8.1             | 1529            | 5.5             | 41.1 | -5.3                      | 710             | -69                                   | -20.5                                 |
|            | vc11      | 200  | 1545          | 363             | 5   | 410  | 7.6             | 1458            | -               | 41.4 | -4.6                      | 1069            | -                                     | -                                     |
|            | vc12      | 220  | 2877          | 384             | 5   | 540  | 14.0            | 1443            | 5.6             | 43.8 | -4.9                      | 1042            | -70.7                                 | -21.2                                 |
|            | vc13      | 240  | 2233          | 400             | 5   | 569  | 11.8            | 1440            | 4.2             | 46.2 | -4.3                      | 1442            | -                                     | -                                     |
|            | vc14      | 260  | 5452          | 406             | 5   | 503  | 15.6            | 1448            | 4.8             | 47.7 | -3.4                      | 971             | -72.8                                 | -19.2                                 |
| GSL center | mlg1      | 5    | 2462          | 81              | 54  | 568  | 3.8             | 750             | 2.3             | 18.5 | -2.1                      | 462             | -68.4                                 | -24.2                                 |
|            | mlg2      | 25   | 2502          | 108             | 53  | 830  | 4.8             | 583             | 3.0             | 22.1 | -4.8                      | 892             | -                                     | -                                     |
|            | mlg3      | 45   | 2044          | 104             | 32  | 726  | 3.3             | 400             | 2.3             | 23.8 | -7.5                      | 932             | -67.9                                 | -22.1                                 |
|            | mlg4      | 65   | 1604          | 574             | 20  | 387  | 2.9             | 264             | 3.3             | 24.8 | -10.0                     | 786             | -                                     | -                                     |
|            | mlg5      | 85   | 1648          | 221             | 21  | 596  | 4.0             | 278             | 3.8             | 26.6 | -11.5                     | 979             | -71.1                                 | -24.4                                 |
|            | mlg6      | 115  | 1401          | 75              | 39  | 757  | 4.3             | 230             | 1.5             | 31.9 | -14.1                     | 854             | -                                     | -                                     |
|            | mlg7      | 125  | 1334          | 70              | 48  | 893  | 6.9             | 207             | 1.8             | 32.2 | -15.0                     | 875             | -75.1                                 | -26.4                                 |
|            | mlg8      | 145  | 1285          | 46              | 57  | 585  | 5.9             | 189             | 3.6             | 32.2 | -14.8                     | 675             | -                                     | -                                     |
|            | mlg9      | 165  | 1142          | 57              | 52  | 745  | 4.5             | 188             | 3.3             | 29.0 | -14.1                     | 906             | -77.8                                 | -25.7                                 |
|            | mlg10     | 185  | 1072          | 32              | 49  | 929  | 4.0             | 196             | 1.3             | 26.1 | -12.4                     | 1164            | -77.9                                 | -25.6                                 |
| BTL edge   | slbt1     | 10   | 269           | 24              | 57  | 1249 | 10.5            | 505             | 8.1             | 9.7  | 5.2                       | 229             | -                                     | -                                     |
|            | slbt2     | 30   | 404           | 29              | 97  | 1698 | 3.0             | 1361            | 5.6             | 15.5 | 10.7                      | 583             | -54.8                                 | -6.0                                  |
|            | slbt3     | 50   | 482           | 122             | 106 | 1991 | 1.7             | 2861            | 0.5             | 11.1 | 17.1                      | 404             | -                                     | -                                     |
|            | slbt4     | 70   | 821           | 85              | 59  | 1535 | 2.7             | 2603            | 4.6             | 10.3 | 17.1                      | 299             | -53.7                                 | -8.5                                  |
|            | slbt5     | 113  | 666           | 125             | 28  | 2279 | 6.2             | 3293            | 4.5             | 15.3 | 15.3                      | 331             | -                                     | -                                     |
|            | slbt6     | 133  | 1189          | 125             | 20  | 2111 | 7.9             | 2457            | 3.4             | 14.1 | 16.1                      | 251             | -54.2                                 | -3.4                                  |
|            | slbt7     | 153  | 679           | 175             | 31  | 2156 | 6.0             | 3289            | 4.3             | 15.4 | 15.5                      | 1210            | -                                     | -                                     |
|            | slbt8     | 173  | -             | -               | -   | 2223 | 4.5             | 2901            | 4.3             | 11.0 | 17.1                      | 699             | -53.5                                 | -6.2                                  |
|            | slbt9     | 113  | 566           | 61              | 14  | 1212 | 18.5            | 2037            | 11.2            | 8.8  | 16.1                      | 550             | -                                     | -                                     |
|            | slbt10    | 235  | 616           | 90              | 13  | 1558 | 20.5            | 1805            | 3.5             | 11.1 | 15.3                      | 361             | -58.2                                 | -13.4                                 |
|            | slbt11    | 248  | 722           | 70              | 10  | 1024 | 14.9            | 1406            | 5.6             | 9.1  | 15.9                      | 507             | -                                     | -                                     |
|            | slbt12    | 281  | 1088          | 53              | 11  | 871  | 19.7            | 1432            | 5.3             | 10.7 | 16.0                      | 589             | -66.9                                 | -13.4                                 |
|            | slbt13    | 313  | 767           | 11              | 9   | 643  | 15.3            | 1519            | 3.1             | 10.7 | 16.0                      | 996             | -                                     | -                                     |
|            | slbt14    | 337  | 748           | 27              | 10  | 193  | 14.6            | 1723            | 3.4             | 10.5 | 16.7                      | 1399            | -70.9                                 | -8.2                                  |
|            | slbt15    | 364  | 1506          | 20              | 7   | 244  | 14.2            | 1279            | 6.2             | 6.7  | 18.5                      | 148             | -                                     | -                                     |
|            | slbt16    | 378  | 665           | 107             | 10  | 993  | 21.5            | 2092            | 3.0             | 13.0 | 15.2                      | 1237            | -71.5                                 | -8.6                                  |
| BTL center | mlbt1     | 2.5  | 301           | 5               | 42  | 742  | 4.1             | 378             | 1.7             | 8.0  | 3.4                       | 637             |                                       |                                       |
|            | mlbt2     | 33   | 720           | 49              | 47  | 2777 | 4.6             | 1882            | 3.8             | 14.2 | 11.7                      | 405             | -55.6                                 | -10                                   |
|            | mlbt3     | 68   | 903           | 104             | 38  | 3017 | 9.6             | 2093            | 1.7             | 15.9 | 13.3                      | 1100            | -                                     | -                                     |
|            | mlbt4     | 103  | 1310          | 94              | 49  | 2479 | 4.8             | 2029            | 3.6             | 19.3 | 13.7                      | 628             | -56.7                                 | -7.7                                  |
|            | mlbt5     | 138  | 1224          | 130             | 48  | 3050 | 3.1             | 1763            | 2.5             | 22.0 | 13.4                      | 715             | -                                     | -                                     |
|            | mlbt6     | 168  | 1374          | 112             | 49  | 3477 | 3.8             | 1488            | 1.9             | 27.0 | 13.2                      | 607             | -60.1                                 | -6.4                                  |

|        |     |      |     |     |      |     |      |     |      |      |     |       |      |
|--------|-----|------|-----|-----|------|-----|------|-----|------|------|-----|-------|------|
| mlbt7b | 173 | 1267 | 95  | 56  | 2924 | 7.0 | 1428 | 4.3 | 31.8 | 12.7 | 555 | -     | -    |
| mlbt8  | 208 | 1253 | 96  | 96  | 2504 | 3.2 | 1473 | 3.8 | 36.5 | 12.8 | 553 | -63.2 | -6.1 |
| mlbt9  | 243 | 1263 | 88  | 134 | 2733 | 4.1 | 1791 | 4.0 | 30.6 | 15.6 | 697 | -     | -    |
| mlbt10 | 278 | 1124 | 120 | 106 | 3125 | 6.7 | 2056 | 3.0 | 28.3 | 16.2 | 859 | -69   | -6.9 |
| mlbt11 | 313 | 1222 | 141 | 79  | 3131 | 7.7 | 2256 | 3.7 | 36.5 | 13.6 | 975 | -     | -    |
| mlbt12 | 348 | 2772 | 75  | 49  | 2639 | 4.0 | 2313 | 2.3 | 26.5 | 15.7 | 699 | -69.3 | -6.4 |

**Table S3:** Methane accumulated rates ( $\text{mol CH}_4 \text{ m}^{-2} \text{ year}^{-1}$ ) based on linear fit extrapolation.

| depth (m)  | 2    | 3    | 5    | 8    | 10   | 12    | 15    | 20    | 30    | 50    |
|------------|------|------|------|------|------|-------|-------|-------|-------|-------|
| GSL edge   | 5.7  | 6.38 | 7.27 | 7.57 | 7.57 | 7.57  | 7.58  | 7.58  | 7.58  | 7.59  |
| GSL center | 2.02 | 2.95 | 4.85 | 7.78 | 9.79 | 11.84 | 15    | 20.49 | 32.28 | 59.16 |
| BTL edge   | 5.65 | 6.06 | 6.57 | 6.72 | 6.72 | 6.72  | 6.72  | 6.73  | 6.74  | 6.76  |
| BTL center | 3.43 | 4.12 | 5.57 | 7.92 | 9.59 | 11.35 | 14.16 | 19.27 | 31.14 | 61.45 |

**Table S4:** Methane accumulated rates ( $\text{mol CH}_4 \text{ m}^{-2} \text{ year}^{-1}$ ) based on the power law extrapolation down to the thawed talik (taberite) thickness.

| Depth (m)   | 2   | 3   | 5   | 8   | 10  | 12  | 15  |
|-------------|-----|-----|-----|-----|-----|-----|-----|
| GSL edge    | 5.0 | 5.5 | 6.2 | 6.9 | 7.2 | 7.5 | 7.9 |
| GSL center* | 1.9 | 2.7 | 3.4 | 4.5 | 5.3 | 6.0 | 7.1 |
| BTL edge    | 6.4 | 6.9 | 7.5 | 8.0 | 8.3 | 8.5 | 8.8 |
| BTL center  | 2.7 | 3.4 | 4.6 | 5.9 | 6.7 | 7.4 | 8.4 |

\*The accumulate rate in GSL center was calculated by different fits due to the short core of less than 2 meters. It ranges in 15 meters depth between  $7.1 \text{ mol CH}_4 \text{ m}^{-2} \text{ year}^{-1}$  if constant  $1 \text{ nmol cm}^{-3} \text{ day}^{-1}$  production rates are taken below 3 meters to  $10.7 \text{ mol CH}_4 \text{ m}^{-2} \text{ year}^{-1}$  if the power law extrapolation is taken, and fits also to the error calculated below in table S5.

**Table S5:** Error percentage for accumulated rates in each depth from the power law extrapolation.

| depth (m)  | 2     | 3     | 5     | 8     | 10    | 12    | 15    | 20    | 30     | 50     |
|------------|-------|-------|-------|-------|-------|-------|-------|-------|--------|--------|
| GSL edge   | 10.71 | 11.76 | 12.47 | 7.09  | 3.43  | 0.47  | 2.78  | 6.75  | 11.88  | 17.57  |
| GSL center | 2.16  | 4.87  | 10.17 | 16.75 | 20.50 | 23.89 | 28.70 | 35.98 | 48.92  | 72.11  |
| BTL edge   | 8.09  | 8.25  | 8.44  | 11.54 | 13.46 | 14.94 | 16.65 | 18.64 | 21.32  | 24.21  |
| BTL center | 19.12 | 14.72 | 15.85 | 23.73 | 30.20 | 37.16 | 48.20 | 67.06 | 107.01 | 193.27 |
